# Supplementary material for: Ultra-thin TiO2 nanosheets decorated with Pd quantum dots for high-efficiency hydrogen production from aldehyde solution
Source: Royal Society of Chemistry journal article supplement (doi:10.1039/c5ta08720a), 2015-12-08
Supplement: c5ta08720a1.pdf [file c5ta08720a1.pdf]

**Supporting Information for**

**Ultra-thin TiO<sub>2</sub> nanosheets decorated with Pd quantum dots for  
high-efficiency hydrogen production from aldehyde**

**Shaopeng Li, Hongyan Hu, Yingpu Bi\***

State Key Laboratory for Oxo Synthesis & Selective Oxidation, and National Engineering  
Research Center for Fine Petrochemical Intermediates, Lanzhou Institute of Chemical Physics,  
CAS, Lanzhou 730000, China. E-mail: [yingpubi@licp.cas.cn](mailto:yingpubi@licp.cas.cn).

### **Synthesis of TiO<sub>2</sub> nanosheets**

All the reagents were of analytical grade and were used without further purification. TiO<sub>2</sub> nanosheets with exposed different ratios (001) facets were prepared by the hydrothermal method similar to that reported by Xie.<sup>1</sup> In a typical experimental procedure, 25 mL of Ti(OC<sub>4</sub>H<sub>9</sub>)<sub>4</sub> and 1, 2, 4 and 6 mL of hydrofluoric acid solution (with a concentration ca. 40 wt %) were mixed in a dried Teflon autoclave with a capacity of 100 mL at ambient temperature, followed by hydrothermal treatment of the mixture at 180 °C for 24 h. After being cooled to room temperature, the white precipitate was separated by high-speed centrifugation, washed with ethanol and distilled water for three times, and then dried in an oven at 70 °C for 6 h. The prepared samples were denoted as TiO<sub>2</sub>-HF1, TiO<sub>2</sub>-HF2, TiO<sub>2</sub>-HF4 and TiO<sub>2</sub>-HF6, corresponding to the amount of hydrofluoric acid solution added.

### **Synthesis of Pd/TiO<sub>2</sub> nanosheets**

The Pd/TiO<sub>2</sub> nanosheets catalysts were prepared by impregnation reduction of the above-prepared TiO<sub>2</sub> nanosheets powders (1.0 g) into a clean beaker, which contained 200 mL of deionized water were mixed with appropriate amount of H<sub>2</sub>PdCl<sub>4</sub> solution, vigorously stirred for another 1 h to disperse them completely, and then 1 M NaOH solution was added to this solution to adjust the pH value of solution to about 9.0. Then the NaBH<sub>4</sub> (freshly prepared) was added drop-wise into the solution with a continuous magnetic stirring,<sup>2</sup> the color of the solutions has changed from glassy yellow, brick red, to gray black at last, the reaction solution kept on stirring for 3 h to complete the reduction reaction. The obtained black granules washed with deionized water and dried in a vacuum oven at 70 °C for 6 h. For comparison, the Pd/TiO<sub>2</sub> catalysts were also prepared using commercial Degussa P25, and the nominal weight ratios of Pd to TiO<sub>2</sub> were 2 wt %.

### **Characterizations**

Scanning electron microscope (SEM) images were taken using a field-emission scanning electron microscope (JSM-6701F, JEOL) operated at an accelerating voltage of 5 kV. Transmission electron microscopy (TEM) images were obtained on a transmission electron microscope (JEM1200EX, JEOL) equipped with an energy dispersive X-ray detector (EDX) at an acceleration voltage of 100 kV. The powder X-ray diffraction spectra (Power XRD) measurements were performed on a Philips X'pert MPD instrument using Cu K $\alpha$  radiation(50 kV). X-ray photoelectron spectrometry (XPS) was carried out on an ESCALAB250xi X-ray photoelectron spectrometer using an Al K $\alpha$  source.

### **Activity tests**

In the catalytic activity of experiments, HCHO and NaOH solution (100 mL) was added to the sealed flask (600 mL) and given an amount of catalysts (15 mg), then the hydrogen production reaction was started while the solution was stirred vigorously. The amounts of hydrogen produced were measured by a GC (gas chromatograph) equipped with a TCD detector and argon as carrier gas. The amounts of the hydrogen produced were measured every five minutes, each experiment was measured at least 3 times to make sure accuracy. There is not carbon monoxide or other gaseous product have detected in all these catalytic processes.

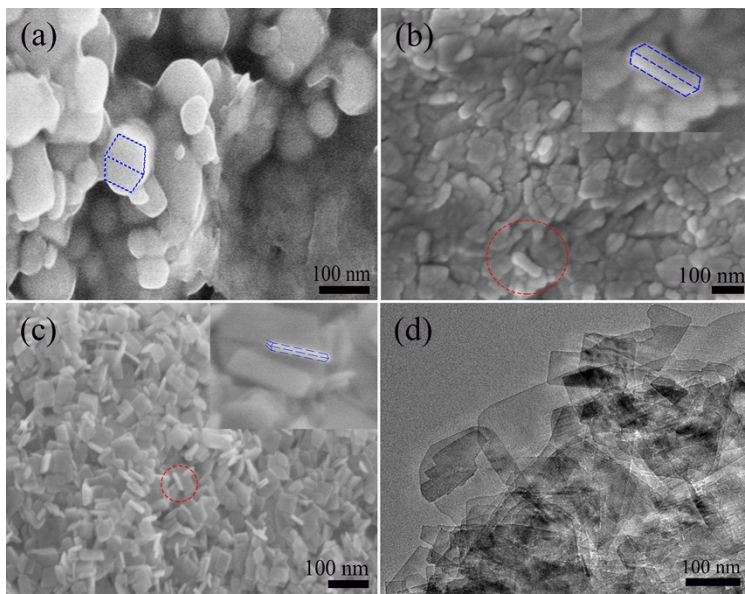

**Fig. S1** (a) SEM images of TiO<sub>2</sub>-HF1, (b) SEM images of TiO<sub>2</sub>-HF2, (c) SEM images of TiO<sub>2</sub>-HF4, (d) TEM images of TiO<sub>2</sub>-HF6. The insets show the enlarged images of (b) TiO<sub>2</sub>-HF2 and (c) TiO<sub>2</sub>-HF4.

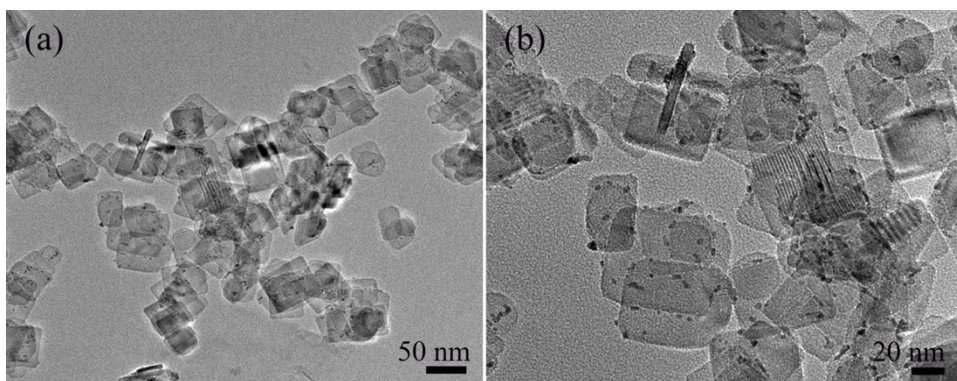

**Fig. S2** (a, b) TEM images of Pd/TiO<sub>2</sub>(TiO<sub>2</sub>-HF4) with different magnifications.

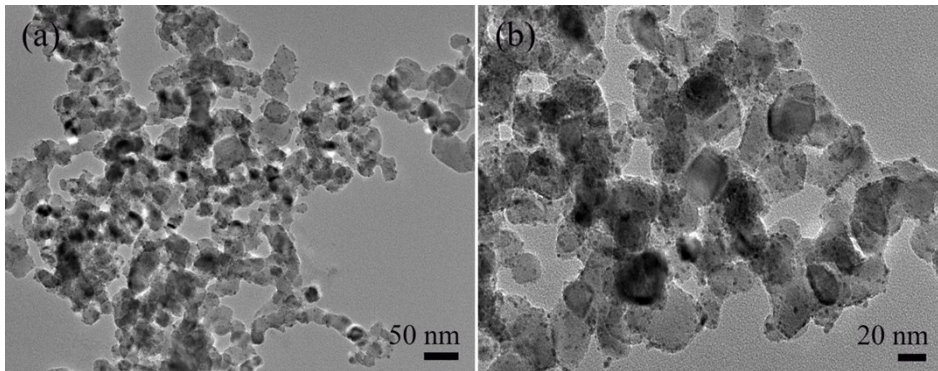

Fig. S3 (a, b) TEM images of Pd/TiO<sub>2</sub>-P25 with different magnifications.

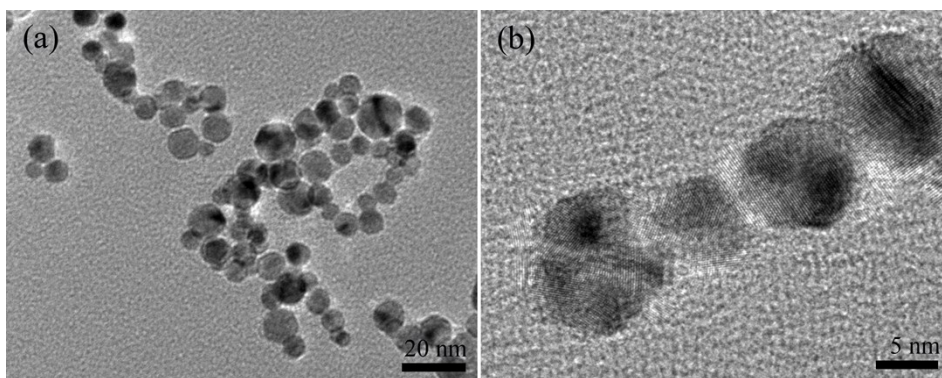

Fig. S4 (a, b) TEM images of Pd nanoparticles with different magnifications.

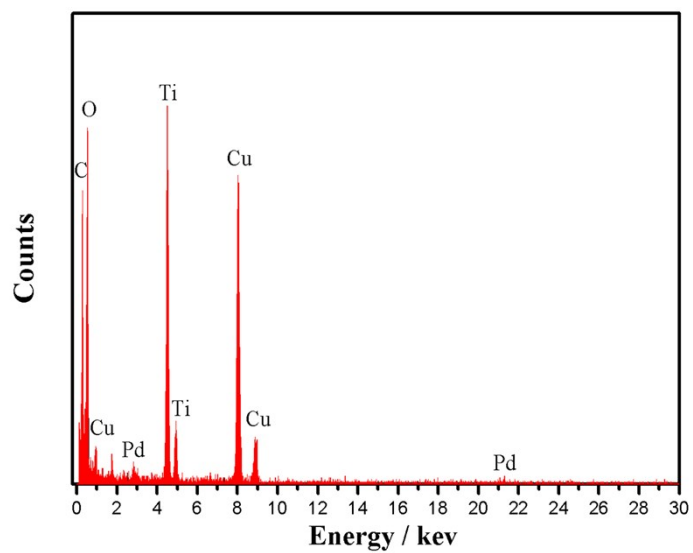

Fig. S5 EDX patterns of as-prepared Pd/TiO<sub>2</sub>-HF4.

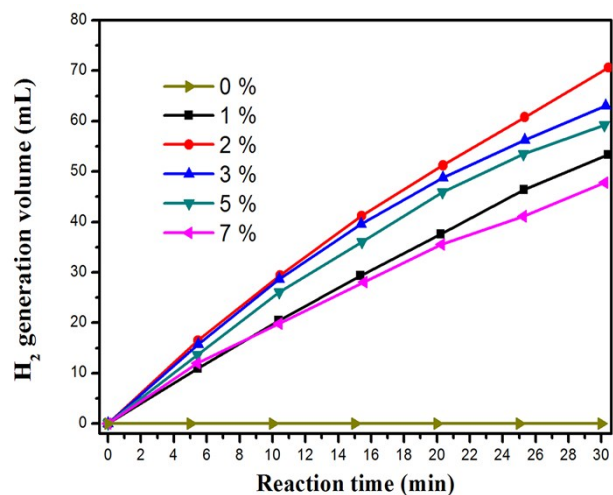

**Fig. S6** The effect of Pd and TiO<sub>2</sub> nominal weight ratio on H<sub>2</sub> production, Pd/TiO<sub>2</sub> catalyst: 15 mg, HCHO: 0.6 mol/L, NaOH: 1.0 mol/L, temperature: 25 °C.

**Table S1** Comparison of the specific surface areas of different TiO<sub>2</sub> samples

| Samples               | Crystalline size (nm) | S <sub>BET</sub> (m <sup>2</sup> /g) | Pore volume (m <sup>3</sup> /g) | Average pore size (nm) |
|-----------------------|-----------------------|--------------------------------------|---------------------------------|------------------------|
| P25                   | 30.1                  | 50.3                                 | 0.18                            | 13.3                   |
| TiO <sub>2</sub> -HF1 | 11.3                  | 122.6                                | 0.07                            | 10.8                   |
| TiO <sub>2</sub> -HF2 | 18.5                  | 108.7                                | 0.36                            | 12.0                   |
| TiO <sub>2</sub> -HF4 | 25.3                  | 94.2                                 | 0.41                            | 14.4                   |
| TiO <sub>2</sub> -HF6 | 32.6                  | 76.5                                 | 0.21                            | 15.8                   |

#### References:

- 1 X. Han, Q. Kuang, M. Jin, Z. Xie and L. Zheng, *J. Am. Chem. Soc.*, 2009, **131**, 3152.
- 2 L. Nie, J. Yu, X. Li, B. Cheng, G. Liu and M. Jaroniec, *Environ. Sci. Technol.*, 2013, **47**, 2777.
